# Supplementary material for: Diurnal Rhythms Result in Significant Changes in the Cellular Protein Complement in the Cyanobacterium Cyanothece 51142
Source: PubMed Central journal article supplement (PMC3043056; doi:10.1371/journal.pone.0016680), 2011-02-22
Supplement: pone.0016680.s004.pdf [file pone.0016680.s004.pdf]

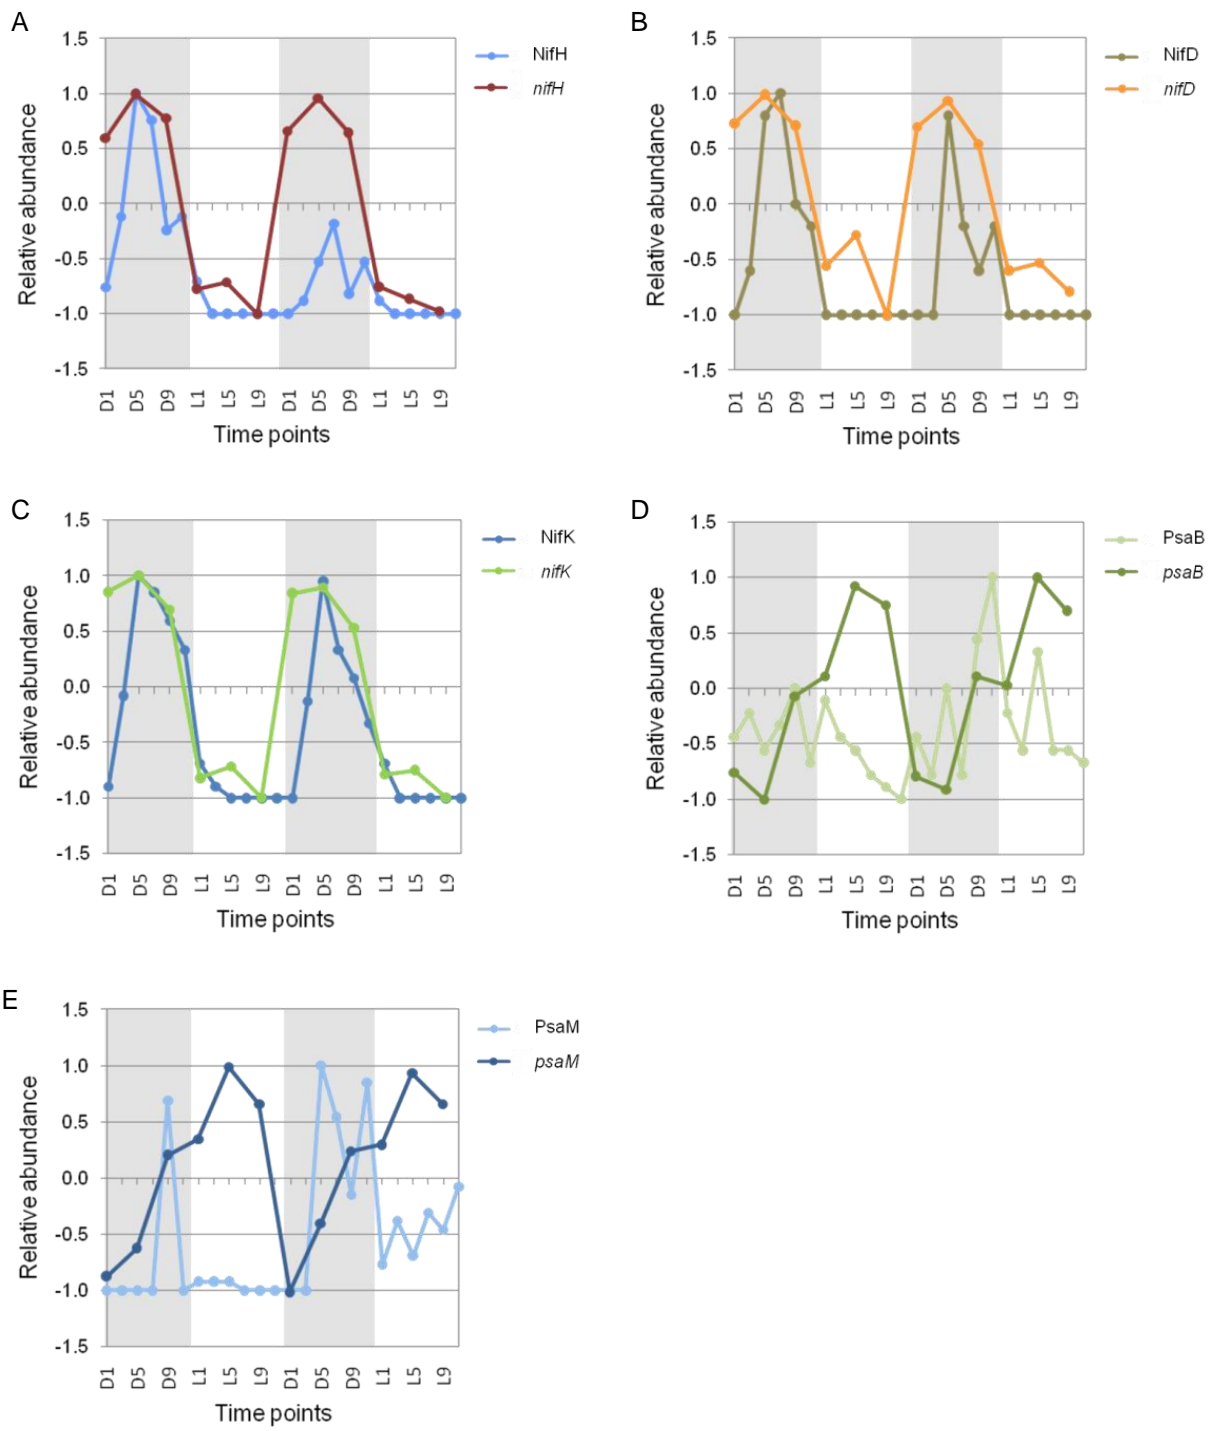

Figure S4
